# Supplementary material
Source: MDPI journal article supplement (https://www.mdpi.com/2075-163X/13/6/749)

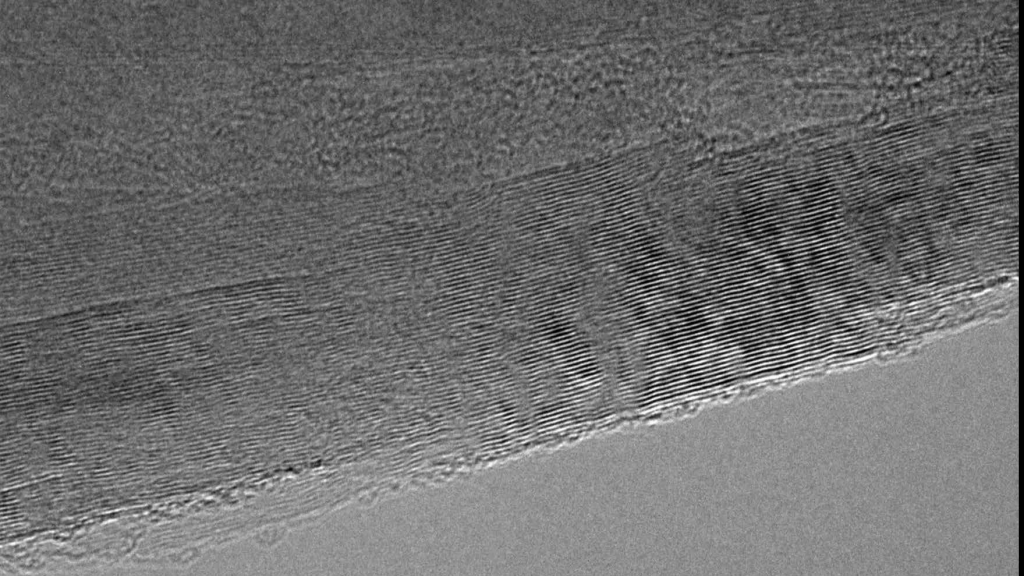

10 nm

**JZSD-20K-1700°C**

Supplement: s1 [file Figure S1.pdf › Figure S1.pdf]
